# Supplementary material for: The association between triglyceride-glucose index and its combination with obesity indicators and cardiovascular disease: NHANES 2003–2018
Source: PubMed Central journal article supplement (PMC10771672; doi:10.1186/s12933-023-02115-9), 2024-01-06

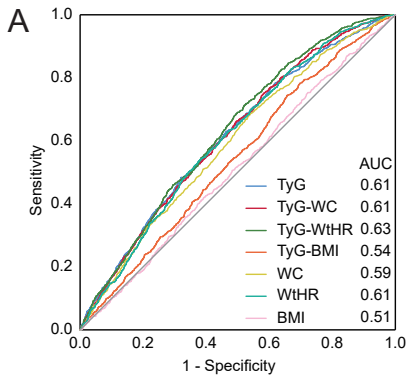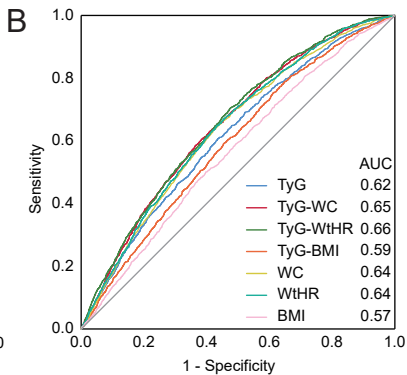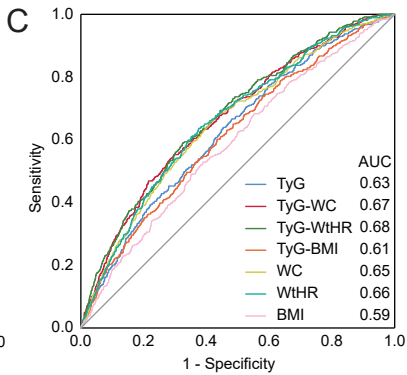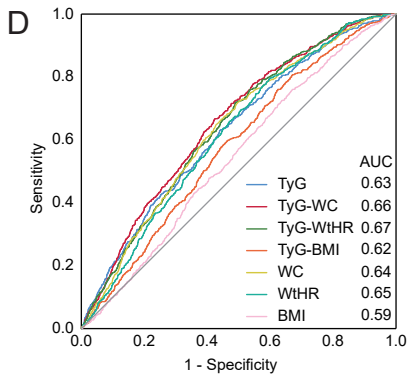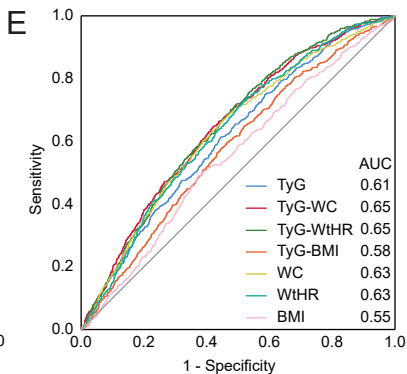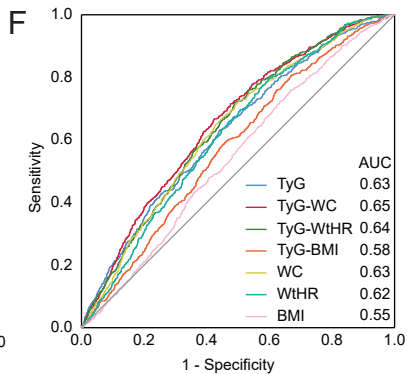

Supplement: 12933_2023_2115_MOESM2_ESM.pdf [file 12933_2023_2115_MOESM2_ESM.pdf]
